# Supplementary material for: Locking the free-rotation of a prochiral star-shaped guest molecule inside a two-dimensional nanoporous network by introduction of chlorine atoms
Source: Royal Society of Chemistry journal article supplement (doi:10.1039/c1cc12951a), 2011-01-01
Supplement: c1cc12951a.pdf [file c1cc12951a.pdf]

## Locking the free-rotation of a prochiral star-shaped guest molecule inside a two-dimensional nanoporous network by introduction of chlorine atoms.

Hélène Bertrand,<sup>a</sup> Fabien Silly,<sup>b,c</sup> Marie-Paule Teulade-Fichou,<sup>a</sup>  
Ludovic Torteche,<sup>b,c</sup> and Denis Fichou<sup>\*b,c</sup>

<sup>a</sup> Institut Curie, Section Recherche, CNRS, UMR176,  
Centre Universitaire Paris XI, F-91405 Orsay, France

<sup>b</sup> CEA-Saclay, Organic Nanostructures and Semiconductors Lab,  
IRAMIS, SPCSI, F-91191 Gif-sur-Yvette, France

<sup>c</sup> IPCM, UMR CNRS 7201, Université Pierre et Marie Curie,  
4, place Jussieu, F-75005 Paris, France

### Electronic Supplementary Information (ESI)

#### 1. Lattice parameters measurements on drift-free STM images

As we sometime observe on our STM images of the TrisK networks, the 2D lattices progressively evolve from a regular to a slightly distorted hexagonal arrangement. Such a lattice distortion arises from thermal drift during data acquisition, as confirmed by the STM image of Fig. S1.

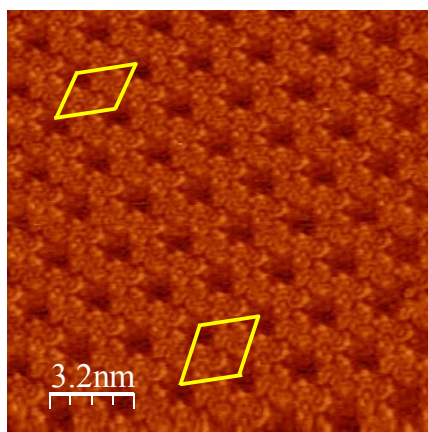

**Fig. S1** Typical STM image ( $16 \times 16 \text{ nm}^2$ ;  $V_s = +1.0 \text{ V}$ ;  $I_t = 10 \text{ pA}$ ) of the empty honeycomb TrisK-3Cl network showing a vertical distortion of the 2D lattice due to thermal drift. The two rhombic unit cells materialized in yellow are substantially different in the upper ( $a = 2.7 \text{ nm}$ ;  $b = 1.9 \text{ nm}$ ;  $\gamma = 57^\circ$ ) and the lower ( $a = 2.7 \text{ nm}$ ;  $b = 2.4 \text{ nm}$ ;  $\gamma = 60^\circ$ ) part of image.

Therefore, in order to avoid any misinterpretation we perform the measurement of the (a,b, $\gamma$ ) lattice parameters on drift-free images such as in Fig. S2.

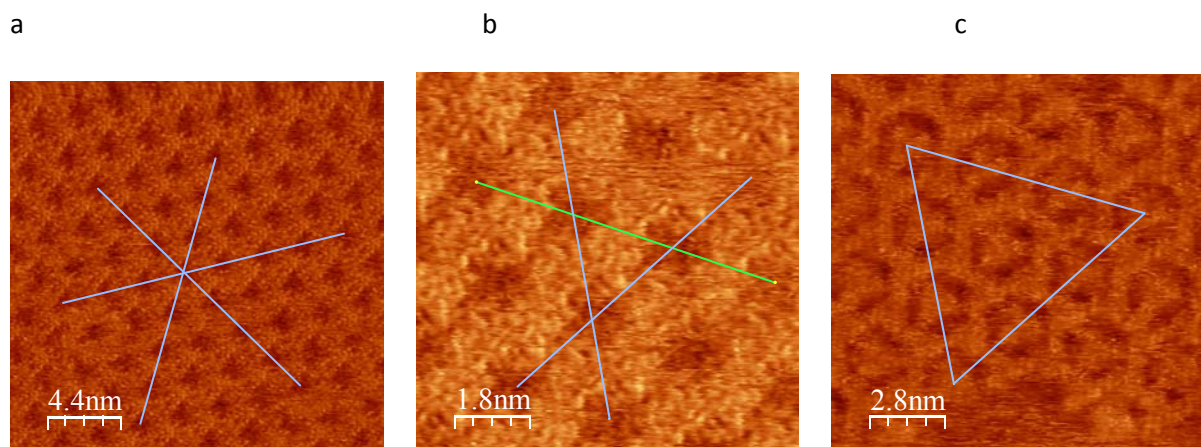

**Fig. S2** (a,b) Drift-free STM images of the empty TrisK-3Cl network. The measured (a,b) lattice parameters are identical all over both images ( $a=b=24 \text{ \AA}$ ;  $\gamma=60^\circ$ ). (c) Drift-free STM image of the filled TrisK-3Cl network and height profiles along the three blue lines showing that the hexagonal symmetry of the nanopores is regular and the lattice parameters of the rhombic cell are identical ( $a=b=29 \text{ \AA}$ ;  $\gamma=60^\circ$ ).

## 2. Large scale model of the TrisK-3Cl filled network

For the sake of clarity in the model presented in Fig.3b of our article we deliberately omitted to draw the C<sub>3</sub>H<sub>7</sub> chains of the TrisK-3Cl molecules. However, in order to discuss the possible interactions responsible for the locking of the central trapped molecule it is necessary to draw them. Therefore Fig.S3 is a large scale model showing that interactions can take place between the C<sub>3</sub>H<sub>7</sub> chains of the trapped molecule and the inner atoms of the peripheral molecules constitutive of the cavities. These interactions may involve either steric hindrance and/or weak CH...Cl bonds between the H-atoms of the C<sub>3</sub>H<sub>7</sub> chains and the Cl-atoms of the peripheral molecules.

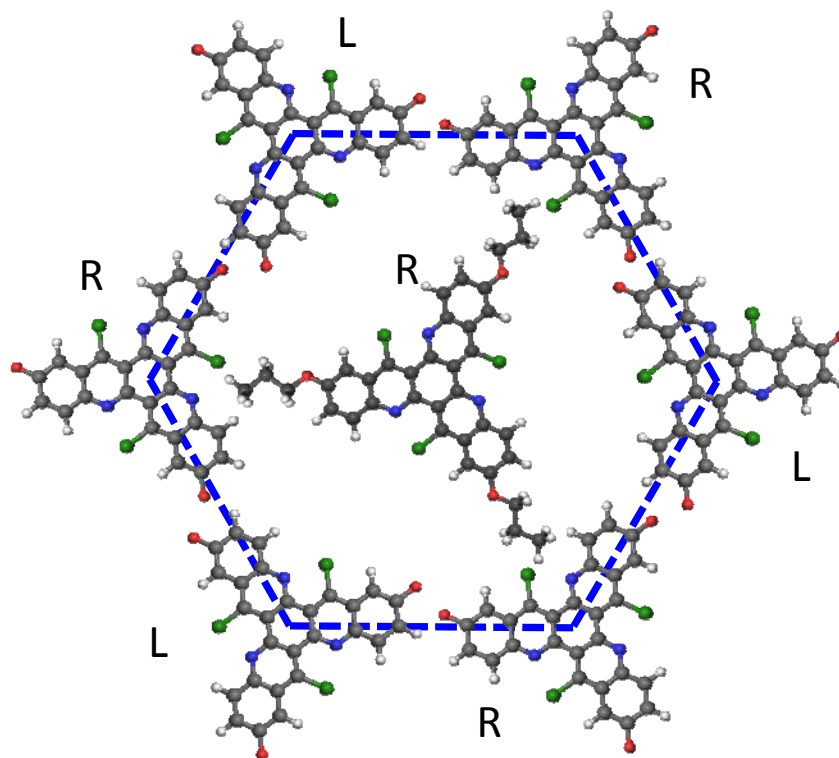

**Fig. S3** Model of the hexagonal 2D molecular arrangement with alternate left (L) and right (R) handed TrisK-3Cl molecules (Cl-atoms are in green). The C<sub>3</sub>H<sub>7</sub> chains of the trapped molecule are represented. The model shows the possible interactions between the C<sub>3</sub>H<sub>7</sub> chains of the trapped molecule and the inner atoms (H and Cl) of the peripheral molecules.
